# Supplementary material
Source: publisher site journal article supplement (https://mbmg.pensoft.net/article/download/suppl/3683923/)
Supplement: Supplementary file 1

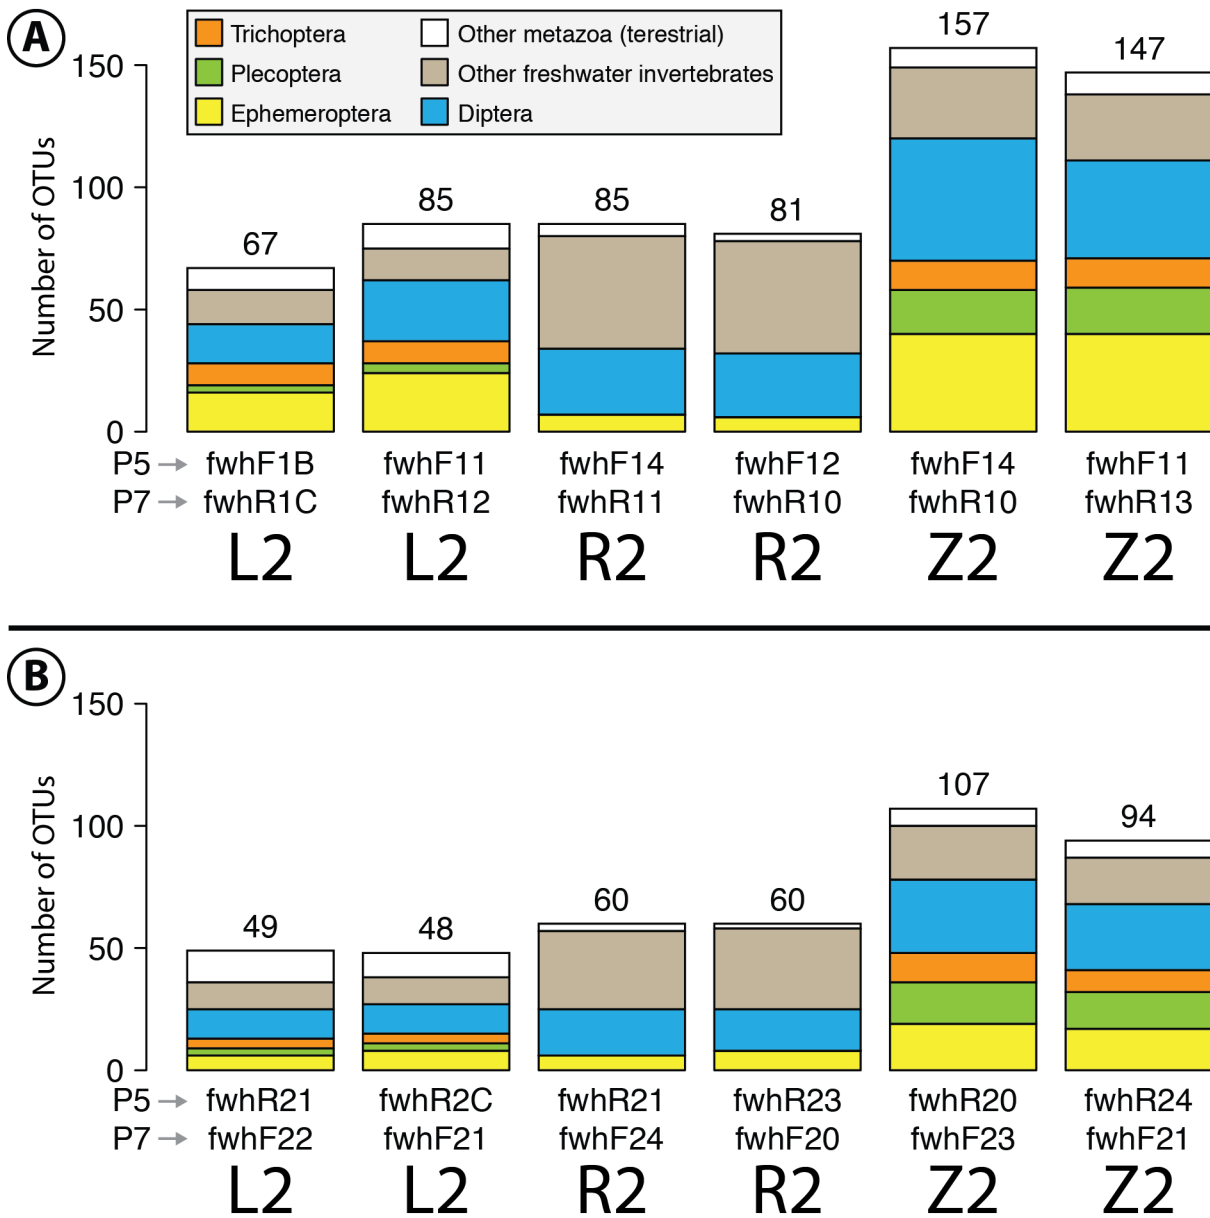

**Figure S7:** Bar plot showing the OTU composition of samples and replicates for key macroinvertebrate orders.
